# Supplementary material
Source: HighWire-hosted journal article supplement (https://bmjopen.bmj.com/content/8/4/e017249)
Supplement: inline-supplementary-material-1 [file inline-supplementary-material-1.pdf]

**Supplementary Table 1. Upgrade items of PLOEM version 2.0**

|    | <b>Factors visualized simulataneously<br/>in the same screenshot</b> | <b>PLOEM<br/>version 1.0</b> | <b>PLOEM<br/>version 2.0</b> |
|----|----------------------------------------------------------------------|------------------------------|------------------------------|
| 1  | Research ID by numbering                                             | yes                          | yes                          |
| 2  | Research title with PMID by mouse-rollover                           | yes                          | yes                          |
| 3  | Research design by different dot styles                              | yes                          | yes                          |
| 4  | Publication year by timeline (horizontal axis)                       | yes                          | yes                          |
| 5  | Multiple treatment options by vertical axis                          | yes                          | yes                          |
| 6  | Direct links to the study by clicking the mouse                      | yes                          | yes                          |
| 7  | Downloading of DEF (Microsoft excel form)                            | yes                          | yes                          |
| 8  | Networking for comparative studies                                   | no                           | yes                          |
| 9  | Listing the candidate studies for quantitative MA                    | no                           | yes                          |
| 10 | Subgroup mapping for the selected periods                            | no                           | yes                          |
| 11 | Uploading of DEF (Microsoft excel form)                              | no                           | yes                          |
| 12 | Registering individual user's online account                         | no                           | yes                          |
| 13 | Saving uploaded data on the PLOEM web (needs sign-in)                | no                           | yes                          |
| 14 | Overviewing the non-adjusted pooled overall survival                 | no                           | yes                          |

\* PMID, pubmed ID; DEF, data extraction form; MA, meta-analysis
